# Supplementary material
Source: PubMed Central journal article supplement (PMC8259494)
Supplement: CJN.16281020SupplementaryData.pdf [file CJN.16281020SupplementaryData.pdf]

## **Supplemental Material Table of contents**

Supplemental Table 1. Clinical characteristics of the study population

Supplemental Table 2. Comparison of patients with and without FSGS

Supplemental Material. Histopathological criteria for common descriptions

Supplemental Table 1. Clinical characteristics

|                                      | Total<br>N=85    | Severe AKI<br>n=46 | No severe AKI<br>n=39 |
|--------------------------------------|------------------|--------------------|-----------------------|
| <b>Demographic and comorbidities</b> |                  |                    |                       |
| Age (y)                              | 57 (49-66)       | 61 (50-69)         | 56 (47-62)            |
| Gender: male                         | 59 (69)          | 35 (76)            | 24 (61)               |
| Weight (kg)                          | 78 (70-90)       | 79 (70-91)         | 78 (68-90)            |
| BMI (kg/m <sup>2</sup> )             | 29 (26-35)       | 30 (27-34)         | 29 (25-35)            |
| Diabetes                             | 43 (51)          | 20 (43)            | 23 (59)               |
| Hypertension                         | 39 (46)          | 19 (41)            | 20 (51)               |
| Chronic lung disease                 | 8 (9)            | 3 (6)              | 5 (13)                |
| Previous heart disease               | 9 (11)           | 6 (13)             | 3 (8)                 |
| Chronic kidney disease               | 6 (7)            | 2 (4)              | 4 (10)                |
| Previous ACEIs/ARBs                  | 34 (40)          | 17 (37)            | 17 (44)               |
| <b>Laboratories at admission</b>     |                  |                    |                       |
| WBC (x mm <sup>3</sup> )             | 9.7 (7.2-13)     | 9.7 (7.2-12.3)     | 10.1 (7.2-13.5)       |
| Hemoglobin (g/dl)                    | 14.8 (13.5-16.3) | 14.9 (14-16.5)     | 14.4 (13-16.1)        |
| Lymphocytes (x mm <sup>3</sup> )     | 0.7 (0.5-1.2)    | 0.7 (0.5-1.2)      | 0.7 (0.4-1.2)         |
| Platelets (x mm <sup>3</sup> )       | 233 (176-307)    | 228 (172-305)      | 242 (193-311)         |
| Glucose (mg/dl)                      | 158 (118-250)    | 160 (120-235)      | 141 (115-251)         |
| Urea nitrogen (mg/dl)                | 23 (15-35)       | 27 (17-38)         | 19 (13-32)            |
| D-dimer (ng/ml)                      | 1146 (606-2675)  | 957 (579-1854)     | 1350 (610-3610)       |
| LDH (U/L)                            | 560 (412-742)    | 577 (506-729)      | 502 (384-755)         |
| Albumin (g/dl)                       | 3.2 (3.0-3.6)    | 3.2 (3.0-3.6)      | 3.1 (2.9-3.5)         |
| Creatine kinase mg/dl)               | 159 (65-362)     | 188 (88-430)       | 126 (61-324)          |
| C reactive protein (mg/L)            | 235 (117-342)    | 214 (127-284)      | 252 (79-348)          |
| <b>In-hospital medication</b>        |                  |                    |                       |
| Anticoagulant                        |                  |                    |                       |
| Prophylactic                         | 38 (45)          | 21 (46)            | 17 (44)               |
| Therapeutic                          | 45 (53)          | 25 (54)            | 20 (51)               |
| Antiviral                            | 40 (47)          | 22 (48)            | 18 (46)               |
| Lopinavir/ritonavir                  | 31 (36)          | 17 (37)            | 14 (36)               |
| Oseltamivir                          | 9 (11)           | 5 (11)             | 4 (10)                |
| Steroids                             | 56 (66)          | 35 (76)            | 21 (54)               |
| Tocilizumab                          | 6 (7)            | 2 (4)              | 4 (10)                |
| NSAIDs                               | 7 (8)            | 4 (9)              | 3 (8)                 |
| Vancomycin                           | 17 (20)          | 14 (30)            | 3 (8)                 |
| Amikacin/Gentamicin                  | 5 (6)            | 1 (2)              | 4 (10)                |
| Colistin                             | 5 (6)            | 2 (4)              | 3 (8)                 |
| Amphotericin B                       | 1 (1)            | 1 (2)              | 0 (0)                 |
| Vasopressors                         | 70 (82)          | 42 (91)            | 28 (72)               |
| <b>In-hospital evolution</b>         |                  |                    |                       |
| Co-infections                        | 45 (53)          | 31 (67)            | 14 (36)               |
| Venous thrombosis                    | 9 (11)           | 4 (9)              | 5 (13)                |
| Length of hospital stay (days)       | 11 (7-16)        | 11 (8-17)          | 10 (3-16)             |
| <b>Renal evolution</b>               |                  |                    |                       |
| SCr at admission (mg/dl)             | 1.0 (0.8-1.5)    | 1.1 (0.8-1.7)      | 0.9 (0.7-1.4)         |
| Maximum SCr (mg/dl)                  | 2.5 (1.2-4.2)    | 3.9 (2.8-5.9)      | 1.2 (1.0-1.6)         |
| SCr at end of follow-up (mg/dl)      | 1.9 (1.0-4.1)    | 3.1 (2.2-5.0)      | 1.0 (0.8-1.5)         |
| Renal replacement therapy            | 15 (18)          | 15 (33)            |                       |

Data expressed as median (25<sup>th</sup>-75<sup>th</sup>) or as number (%).

Supplemental Table 2. Comparison of clinical and histopathological characteristics between patients with and without focal and segmental glomerulosclerosis (excluding 4 patients with tip variant).

|                                          | No FSGS<br>n=60 | FSGS<br>n=21 | p     |
|------------------------------------------|-----------------|--------------|-------|
| <b>Baseline clinical characteristics</b> |                 |              |       |
| Gender: male                             | 45 (75)         | 13 (62)      | 0.25  |
| Diabetes                                 | 27 (45)         | 13 (62)      | 0.18  |
| Hypertension                             | 25 (42)         | 12 (57)      | 0.22  |
| Chronic lung disease                     | 4 (7)           | 3 (14)       | 0.28  |
| Previous heart disease                   | 7 (12)          | 2 (10)       | 0.79  |
| Chronic kidney disease                   | 2 (3)           | 2 (10)       | 0.26  |
| <b>Tubulointerstitium</b>                |                 |              |       |
| ATI                                      |                 |              | 0.87  |
| Mild                                     | 24 (40)         | 10 (48)      |       |
| Moderate                                 | 20 (33)         | 5 (24)       |       |
| Severe                                   | 11 (18)         | 4 (19)       |       |
| Bacterial foci                           | 2 (3)           | 1 (5)        | 0.76  |
| Protein casts                            | 35 (58)         | 14 (67)      | 0.51  |
| Molding casts                            | 14 (23)         | 6 (29)       | 0.63  |
| Pigment casts                            | 31 (52)         | 13 (62)      | 0.42  |
| Cytoplasmatic pigments                   | 34 (57)         | 13 (62)      | 0.67  |
| Syncytium                                | 16 (27)         | 7 (33)       | 0.56  |
| Regeneration                             |                 |              | 0.21  |
| Mild                                     | 35 (58)         | 12 (57)      |       |
| Moderate                                 | 16 (27)         | 9 (43)       |       |
| Severe                                   | 6 (10)          | 0 (0)        |       |
| Isometric vacuolation                    | 45 (75)         | 18 (86)      | 0.31  |
| Microthrombosis                          | 2 (3)           | 0 (0)        | 0.39  |
| <b>IFTA</b>                              |                 |              |       |
| 0                                        | 27 (45)         | 5 (24)       |       |
| 1                                        | 25 (42)         | 11 (52)      |       |
| 2                                        | 4 (7)           | 5 (24)       |       |
| 3                                        | 4 (7)           | 0 (0)        |       |
| Tubulointerstitial nephritis             | 4 (7)           | 2 (10)       | 0.67  |
| <b>Glomeruli</b>                         |                 |              |       |
| Hypoperfusion                            | 28 (47)         | 14 (67)      | 0.11  |
| <b>Diabetic nephropathy</b>              |                 |              |       |
| No                                       | 48 (80)         | 13 (62)      |       |
| DGP class IIA                            | 3 (5)           | 2 (10)       |       |
| DGP class IIB                            | 8 (13)          | 3 (14)       |       |
| DGP class III                            | 1 (2)           | 3 (14)       |       |
| Glomerulomegaly                          | 12 (20)         | 11 (52)      | 0.005 |
| Thrombotic microangiopathy               | 2 (3)           | 2 (10)       | 0.26  |
| Arteriosclerosis                         | 45 (75)         | 20 (95)      | 0.13  |
| <b>Electron microscopy</b>               |                 |              |       |
| Loss of tubular epithelium               | 35 (58)         | 13 (62)      | 0.77  |
| Mitochondrial edema                      | 43 (72)         | 19 (90)      | 0.08  |
| Multivesicular bodies                    | 27 (45)         | 9 (43)       | 0.86  |
| Clathrin coated structures               | 17 (28)         | 8 (38)       | 0.41  |
| Podocyte foot processes edema            | 7 (12)          | 5 (24)       | 0.18  |
| Endothelial edema                        | 11 (18)         | 4 (19)       | 0.94  |
| GBM thickening                           | 10 (17)         | 7 (33)       | 0.11  |
| Mesangial sclerosis                      | 8 (13)          | 6 (29)       | 0.11  |

Data expressed as n (%)

## Supplemental Material. Histopathological criteria

### Focal and segmental glomerulosclerosis (FSGS): Columbia classification

Not otherwise specified: Segmental increase in matrix obliterating the capillary lumina, excluding other FSGS variants.

Perihilar: Perihilar hyalinosis, >50% of glomeruli with segmental lesions must have perihilar sclerosis or hyalinosis.

Tip: At least 1 segmental lesion involving the tip domain (outer 25% of tuft next to origin of proximal tubule), and the lesion must have either an adhesion or confluence of podocytes with parietal or tubular cells.

Cellular: At least 1 glomerulus with segmental endocapillary hypercellularity occluding lumina.

Collapsing: At least 1 glomerulus with segmental or global collapse and overlying podocyte hypertrophy and hyperplasia.

Glomerulomegaly: glomerular tuft larger than 1.5x that in age-matched controls.

Glomerular hypoperfusion: retraction and collapse of the glomerular capillary tuft.

Thrombotic microangiopathy (TMA): presence of fibrin thrombi and endothelial swelling in arteriole or glomerular capillary with ischemic changes.

Acute interstitial nephritis (AIN): interstitial edema and predominant mononuclear cell infiltration.

Acute tubular injury (ATI): flattening of the tubular epithelium, loss of brush border and vacuolization, with variable intraluminal granular casts.

Diabetic glomerulopathy: mesangial matrix expansion, nodular sclerosis, diffuse membrane thickening and arteriole hyalinosis.
